# Supplementary material
Source: PubMed Central journal article supplement (PMC5502957)
Supplement: DS_10.1177_0022034517704375.pdf [file DS_10.1177_0022034517704375.pdf]

## Mechanobehavioral Scores in Women with and without TMJ Disc Displacement

L.R. Iwasaki, Y.M. Gonzalez, Y. Liu, H. Liu, M. Markova, L.M. Gallo, and J.C. Nickel

### Appendix

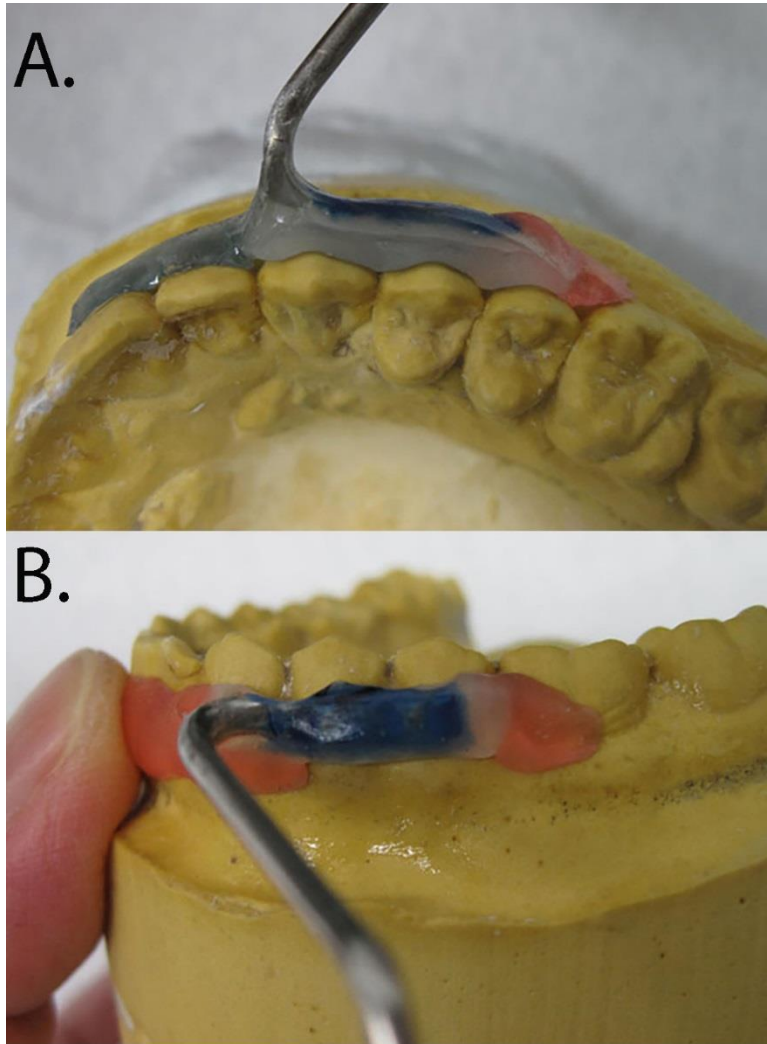

Appendix Figure 1. A. Maxillary and B. mandibular custom acrylic splints shown on study models prior to luting to teeth temporarily using glass ionomer orthodontic band cement (Band-Lok Blue, Reliance Orthodontic Products, Inc., Itasca IL).

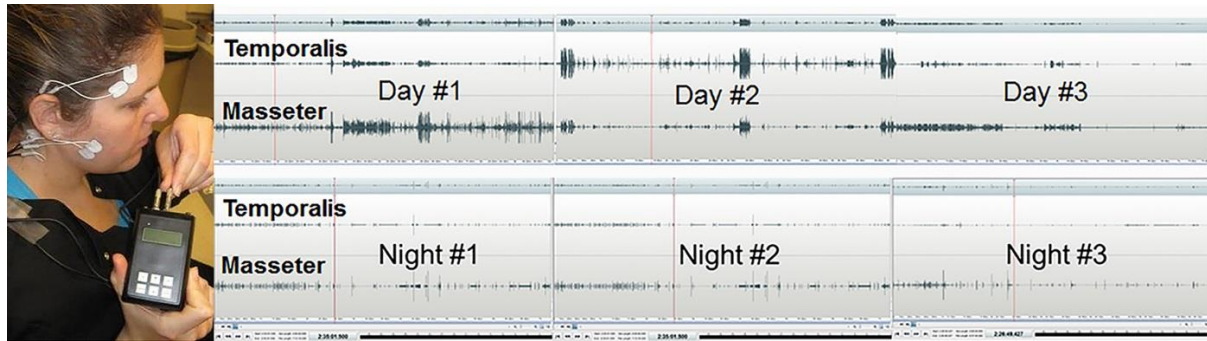

Appendix Figure 2. Right: Ambulatory electromyography recorder held by subject wearing surface electrodes on anterior temporalis and masseter muscles and mastoid process (ground). Left: Examples of one subject's self-recordings from the two muscles on Days 1-3 and Nights 1-3 where durations of recording varied between approximately 6 and 9 hours each.
